# Supplementary material for: Stabilizing cathodes of lithium–sulfur batteries by the chemical binding of sulfur and their discharge products to carbon nanofibers
Source: Royal Society of Chemistry journal article supplement (doi:10.1039/c9nj03031j), 2019-01-01
Supplement: c9nj03031j1.pdf [file c9nj03031j1.pdf]

## **Electronic supplementary information**

### **Stabilizing Cathodes of Lithium-Sulfur Battery by Chemical Binding of Sulfur and Their Discharge Products to Carbon Nanofibers**

*Dan Li, Jie Liu, Na Xu, Mengfan Wang, Xuejun Liu, Tingzhou Yang, Tao Qian,\* Chenglin Yan*

College of Energy, Key Laboratory of Advanced Carbon Materials and Wearable Energy Technologies of Jiangsu Province, Soochow University, Suzhou 215006, China.

\*Corresponding author: tqian@suda.edu.cn

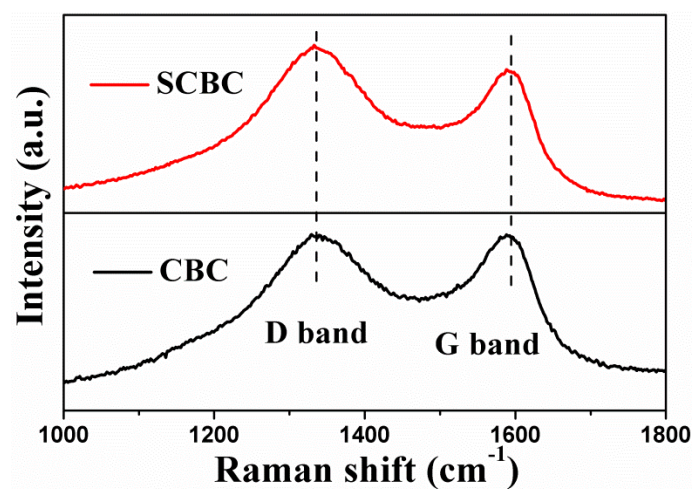

**Fig. S1** The comparison of SCBC and carbonized bacterial cellulose in Raman spectra, manifesting the successful graft of sulfhydryl groups on carbonized bacterial cellulose.

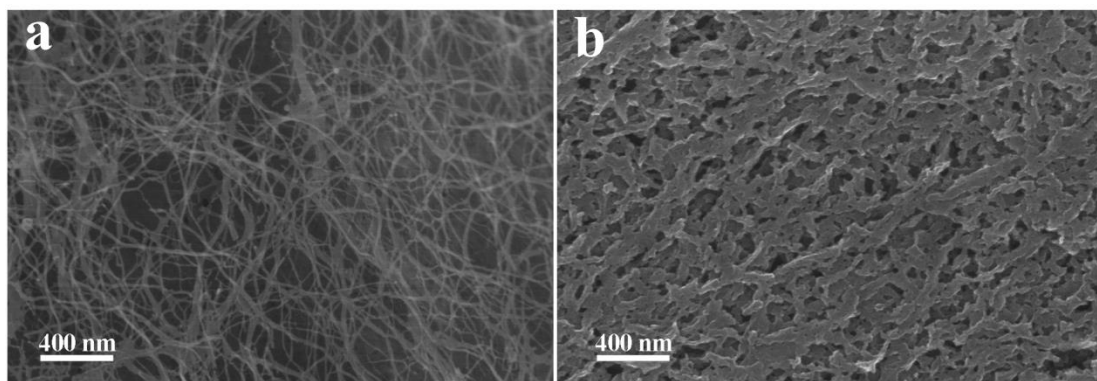

**Fig. S2** SEM images of (a) carbonized bacterial cellulose and (b) SCBC nanofiber.

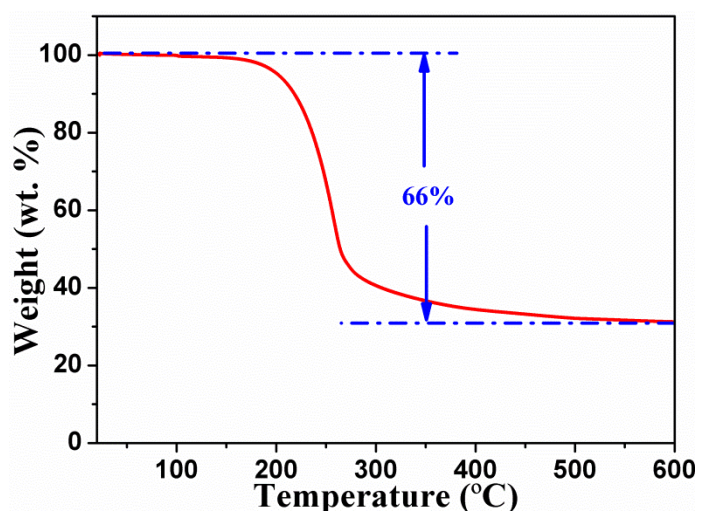

**Fig. S3** TGA profiles for SCBC/S from 25 to 500 °C at a rate of 10 °C min<sup>-1</sup>, the total content of sulfur in SCBC/S is ~66%.

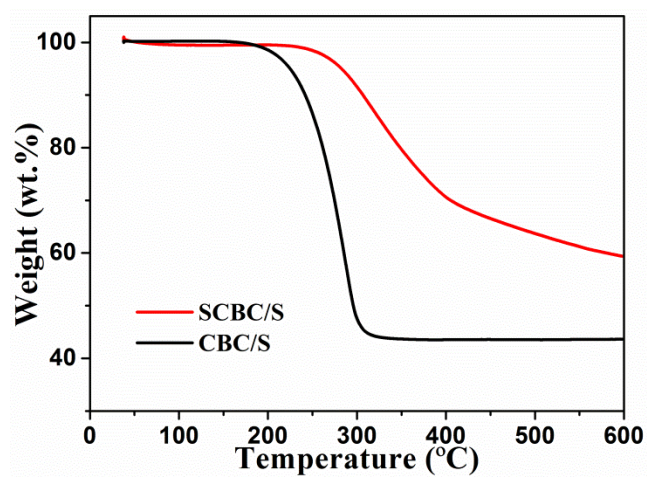

**Fig. S4** TGA comparison. After removing sulfur inside the matrix physically completely, sulfur in SCBC/S exhibited a higher decomposition temperature ( $>245\text{ }^{\circ}\text{C}$ ) than CBC/S, demonstrating small sulfur molecules are covalently bound to SCBC.

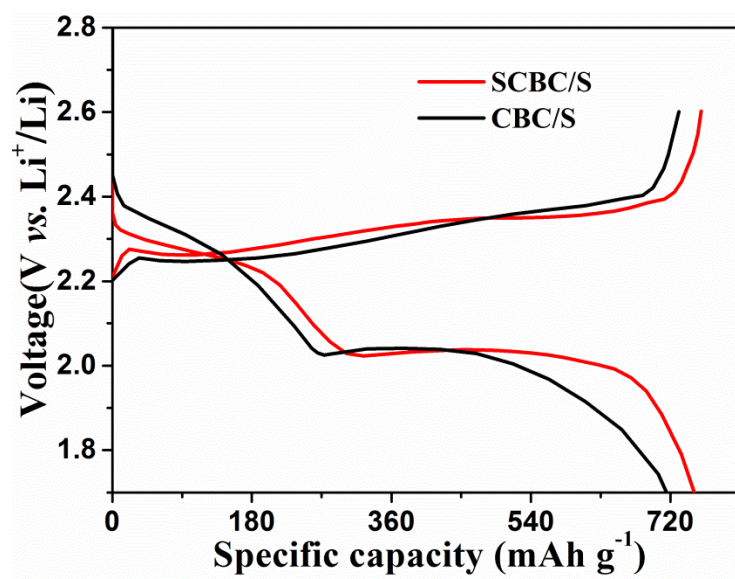

**Fig. S5** Comparison of discharge/charge profiles between SCBC/S and CBC/S.

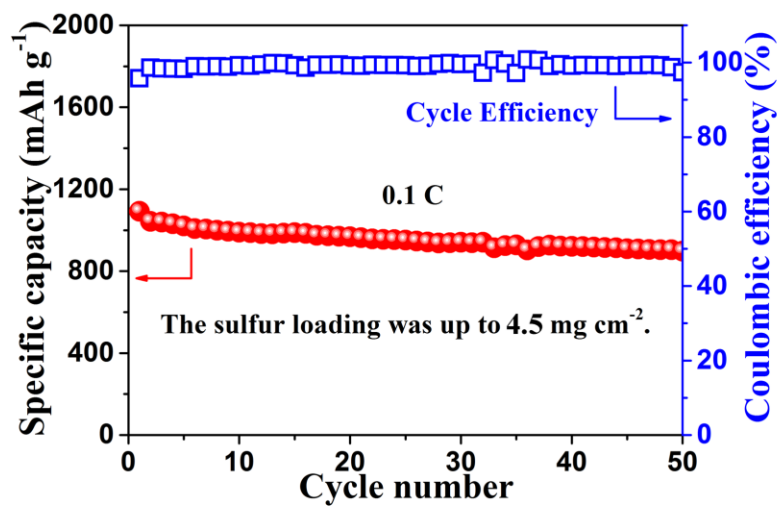

**Fig. S6** Electrochemical performances. When the sulfur loading is up to 4.5 mg cm<sup>-2</sup>, the cell delivered a high initial discharge capacity of 1106 mAh g<sup>-1</sup>.

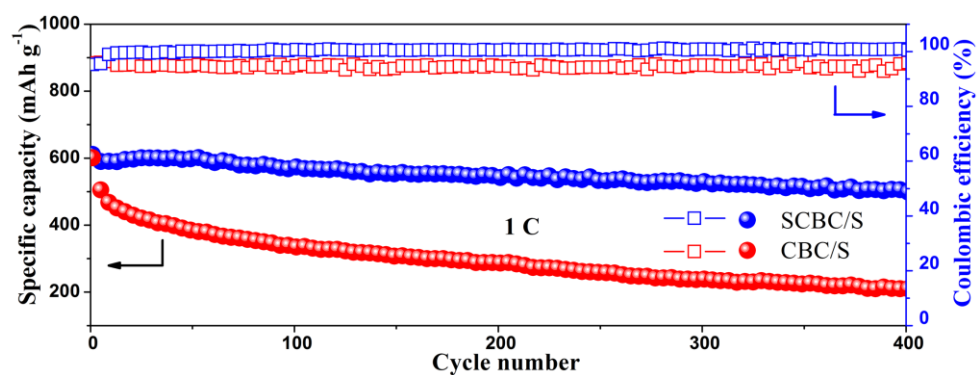

**Fig. S7** The comparison of cycling performance and Coulombic efficiencies between SCBC/S cell and CBC/S cell during 400 cycles at a current rate of 1 C using 1.0 M LiTFSI in DOL/DME (1:1 by volume) without  $\text{LiNO}_3$  as the electrolyte.



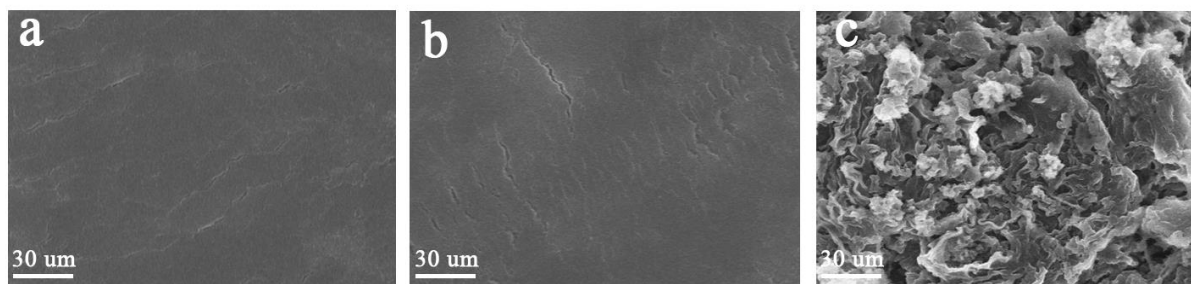

**Fig. S8** SEM images of the surface of (a) the pristine anode, (b) the cycled anode of SCBC/S cell and (c) the cycled anode of CBC/S cell, respectively.

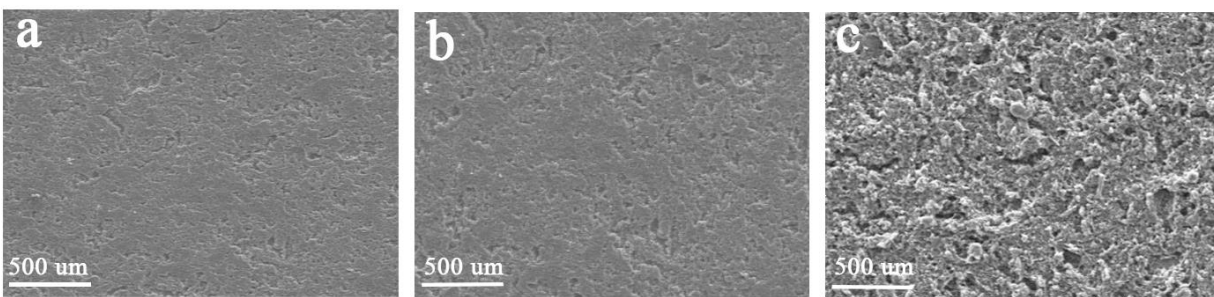

**Fig. S9** SEM images of (a) the pristine cathode, (b) the cycled SCBC/S cathode and (c) the cycled CBC/S cathode, respectively.

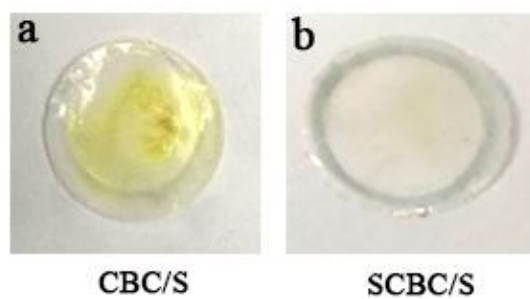

**Fig. S10** Digital photos of cycled separators of (a) CBC/S cell and (b) SCBC/S cell, respectively. Both cells are disassembled after cycling tests.

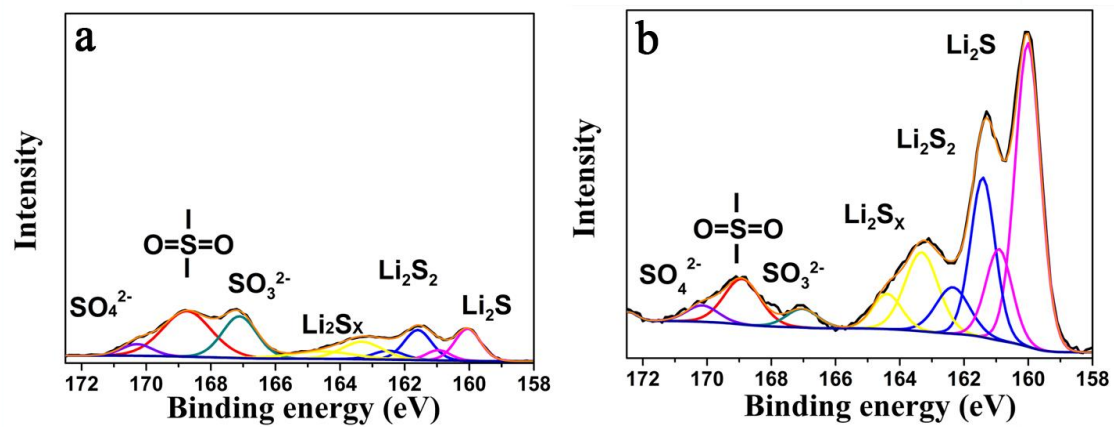

**Fig. S11** High-resolution  $S_{2p}$  spectra of cycled lithium anodes using (a) SCBC/S cathode and (b) CBC/S cathode, respectively.

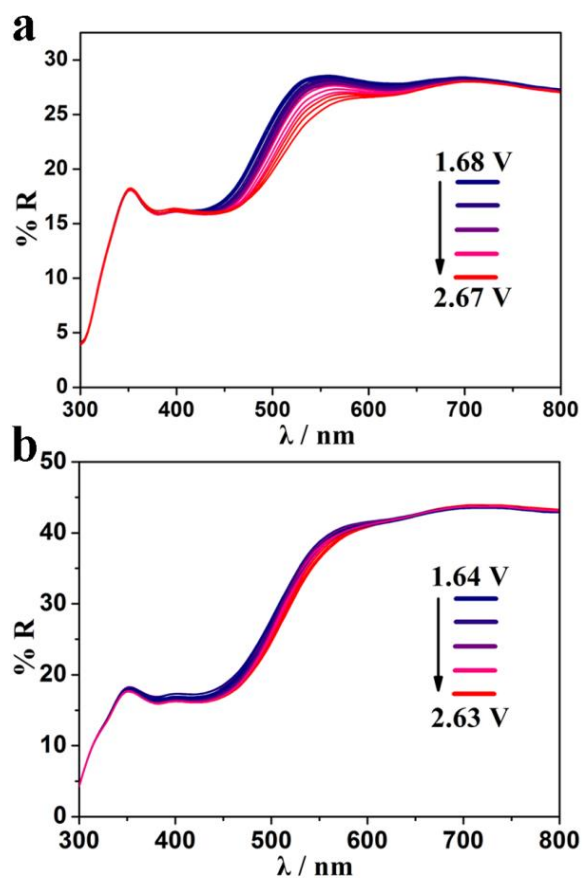

**Fig. S12** Characterizations of UV/Vis spectra in cells charge processes. The comparison of UV/Vis spectra of (a) CBC/S and (b) SCBC/S in charging process. (a) The continuous shift to higher wavelengths suggests the regeneration of long-chain polysulfides. Different from (a) CBC/S, the spectra of (b) SCBC/S shift to higher wavelengths along with its discharge course.

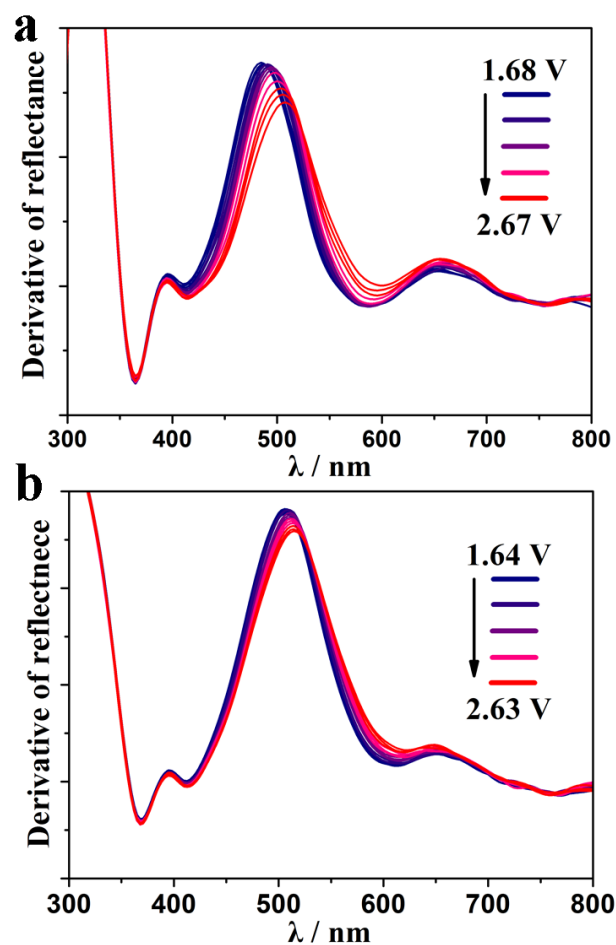

**Fig. S13** Characterizations of first-order derivatives in cells charge processes. The first-order derivatives derived from UV/Vis spectra of (a) CBC/S and (b) SCBC/S cell during charging. The shift of main peaks indicates there is a change between long-chain and short-chain polysulfides in (a) CBC/S cell charging process. The derivatives of (b) SCBC/S cell keep the main peaks in 510 nm all the time.
